# Supplementary material for: Validation of Clinical Characteristics and Effectiveness of Pulmonary Rehabilitation in a COPD Population with Discrepancy between Exercise Tolerance and FEV1
Source: PubMed Central journal article supplement (PMC7825294; doi:10.3390/healthcare9010053), 2021-01-06
Supplement: healthcare-09-00053-s001.pdf [file healthcare-09-00053-s001.pdf]

Table S1

Comparison of pulmonary rehabilitation effects between the A, B, C, and D groups

|               | Group A (n=19) |               | Group B (n=30) |                | Group C (n=24) |                 | Group D (n=16) |                | Comparison between groups |            |
|---------------|----------------|---------------|----------------|----------------|----------------|-----------------|----------------|----------------|---------------------------|------------|
|               | Baseline       | 3 month       | Baseline       | 3 month        | Baseline       | 3 month         | Baseline       | 3 month        | Baseline                  | 3 month    |
| %MEP, %       | 107.0 ± 38.2   | 119.3 ± 38.0  | 106.9 ± 28.5   | 117.8 ± 22.9*  | 75.3 ± 32.2    | 108.2 ± 38.1**  | 71.9 ± 30.4    | 89.6 ± 26.8**  | †, ‡, #                   |            |
| %MIP, %       | 82.7 ± 36.9    | 84.7 ± 35.9   | 95.9 ± 28.3    | 104.7 ± 31.8   | 54.5 ± 22.1    | 71.2 ± 43.2*    | 63.4 ± 25.2    | 75.0 ± 25.4    | †, ##                     |            |
| %IBW, %       | 99.3 ± 19.4    | 98.9 ± 18.1   | 106.1 ± 13.8   | 104.0 ± 14.5   | 94.5 ± 17.7    | 94.1 ± 18.3     | 100.8 ± 15.5   | 103.9 ± 16.2   |                           |            |
| mMRC          | 1.58 ± 0.90    | 1.05 ± 0.85** | 1.10 ± 0.61    | 0.90 ± 0.61    | 2.82 ± 0.96    | 2.59 ± 0.96**   | 2.00 ± 0.85    | 1.53 ± 0.52    | ††, ##, \$\$\$            | ††, \$\$\$ |
| GP, kg        | 34.3 ± 9.5     | 34.5 ± 7.8    | 29.1 ± 8.9     | 29.8 ± 8.5     | 23.7 ± 6.6     | 25.1 ± 6.9      | 25.1 ± 7.8     | 25.7 ± 8.5     | ††, ‡‡                    | ††, ‡‡     |
| %KE, %        | 64.3 ± 12.7    | 63.7 ± 17.8   | 53.5 ± 14.4    | 61.7 ± 14.3**  | 45.7 ± 12.6    | 50.8 ± 15.6*    | 45.5 ± 9.6     | 45.5 ± 7.6     | ¶, ††, ‡‡                 | †, ‡, ##   |
| MGS, m/min    | 112.1 ± 16.2   | 123.5 ± 17.8* | 118.6 ± 19.8   | 123.5 ± 23.6   | 83.8 ± 25.4    | 97.3 ± 18.9**   | 82.6 ± 13.0    | 94.5 ± 10.3*   | ††, ‡, ###                | †, ‡, ##   |
| TUG, sec      | 5.8 ± 0.7      | 5.4 ± 0.9     | 6.1 ± 1.1      | 5.7 ± 1.0      | 9.4 ± 5.7      | 7.4 ± 2.1**     | 8.4 ± 1.9      | 7.3 ± 1.3      | ††                        | ††, ‡‡, ## |
| CS-30, times  | 17.5 ± 4.6     | 18.2 ± 4.1    | 18.0 ± 3.5     | 19.8 ± 3.3**   | 12.5 ± 3.0     | 13.5 ± 3.4      | 14.7 ± 4.3     | 16.3 ± 3.8     | ††                        | ††         |
| 6MWD, m       | 432.3 ± 62.6   | 462.7 ± 80.4* | 450.0 ± 64.7   | 486.9 ± 83.8** | 227.8 ± 104.5  | 279.5 ± 119.6** | 256.1 ± 73.3   | 312.8 ± 91.6** | ††, ‡‡, ###               | ††, ‡‡, ## |
| ISWD, m       | 445.3 ± 153.5  | 473.5 ± 160.3 | 483.6 ± 165.3  | 497.5 ± 161.9  | 201.7 ± 93.1   | 232.8 ± 96.7*   | 215.7 ± 98.3   | 250.7 ± 95.4*  | ††, ‡‡, ###               | ††, ‡‡, ## |
| NRADL, points | 81.4 ± 13.0    | 76.5 ± 24.6   | 90.9 ± 11.2    | 89.5 ± 19.3    | 58.4 ± 22.3    | 61.8 ± 21.8     | 75.1 ± 12.7    | 76.2 ± 23.2    | ††, ##, \$\$\$            |            |
| SGRQ, points  | 40.9 ± 17.6    | 38.6 ± 16.6   | 29.7 ± 15.9    | 23.3 ± 14.9**  | 58.5 ± 18.5    | 56.0 ± 19.4     | 40.4 ± 12.7    | 32.4 ± 13.5**  | †, \$\$\$                 | †, \$\$\$  |

Values are mean ± SD.

\*: Baseline vs 3 month, p < 0.05; \*\*: p < 0.01

¶: A vs B, p<0.05; ¶¶: p<0.01

†: A vs C, p<0.05; ††: p<0.01

‡: A vs D, p<0.05; ‡‡: p<0.01

#: B vs D, p<0.05; ##: p<0.01

⌘: C vs D,  $p < 0.05$ ; ⌘⌘:  $p < 0.01$

%IBW, body weight divided by standard body weight; %KE, ratio of knee extension strength to body weight; %MEP, ratio of maximal expiratory pressure to body weight; %MIP, ratio of maximal inspiratory pressure to body weight; 6MWD, six-minute walking distance; CS-30, 30-second chair stand times; GP, grip power; ISWD, incremental shuttle walking distance; MGS, maximum gait speed; mMRC, modified Medical Research Council dyspnea scale; NRADL, Nagasaki University Respiratory ADL questionnaire; SGRQ, St. George's Respiratory Questionnaire; TUG, timed up and go time.
